# Supplementary material for: Synthesis and fluorescence properties of red-to-near-infrared-emitting push–pull dyes based on benzodioxazole scaffolds
Source: Royal Society of Chemistry journal article supplement (doi:10.1039/d1tb01189h), 2021-01-01
Supplement: d1tb01189h1.pdf [file d1tb01189h1.pdf]

## Supplementary Information

### Synthesis and fluorescence properties of red to near-infrared emitting push-pull dyes based on benzodioxazole scaffolds

Liu Yang<sup>ab†</sup>, Suyuan Chen<sup>c†</sup>, Dong Yi<sup>d</sup>, Qingxin Chen<sup>ab</sup>, Jie Zhang<sup>ab</sup>, Yusheng Xie<sup>ab,\*</sup>,  
Hongyan Sun<sup>ab,\*</sup>

a Department of Chemistry and COSDAF (Centre of Super-Diamond and Advanced Films), City University of Hong Kong, 83 Tat Chee Avenue, Kowloon, Hong Kong, China

b Key Laboratory of Biochip Technology, Biotech and Health Centre, Shenzhen Research Institute of City University of Hong Kong, Shenzhen, 518057, China

c Leibniz-Institut für Analytische Wissenschaften – ISAS–e.V., Otto-Hahn-Strasse 6b, 44227 Dortmund, Germany

d Department of Medicinal Chemistry, School of Pharmacy, Southwest Medical University, Luzhou 646000, China

†These authors contributed equally to this work

Emails: [yushengxie@outlook.com](mailto:yushengxie@outlook.com) (Xie Y), [hongysun@cityu.edu.hk](mailto:hongysun@cityu.edu.hk) (Sun H).

### Table of contents

#### Content

1. Quantum chemistry calculations
2. Chemical synthesis and characterization
3. Supplementary table and Figures.

## 1. Quantum chemistry calculations

Quantum chemistry calculations were performed by Gaussian 16 software conducted using the polarizable continuum model (PCM) with the implicit consideration of the dielectric environment.<sup>1</sup> Geometry optimizations and harmonic vibrational frequency calculations of the ground ( $S_0$ ) and the lowest singlet and triplet excited ( $S_1$  and  $T_1$ ) states were optimized by density functional theory (DFT)<sup>2</sup> and time-dependent density functional theory (TDDFT)<sup>3</sup> with B3LYP functional and 6-311+G(d,p) basis set. The vertical  $\Delta E_{ST}$  values of 2a,3a,3a',4a and 5a were estimated by the vertical energies of  $S_1$  and  $T_1$ . The adiabatic energies of  $S_1$  and  $T_1$  can be obtained by the vertical energies of  $S_1$  and  $T_1$  and their corresponding reorganization energies. Then, the adiabatic  $\Delta E_{ST}$  values of 2a,3a,3a',4a and 5a were also estimated. Electron-Hole Density Distributions, Transition Dipole Moment, Oscillator Strength and dihedral angle were obtained by the Multiwfn 3.7 program<sup>4</sup> and the VMD program<sup>5</sup>.

### Equation of Transition Dipole Moment and Oscillator Strength

**Transition Dipole Moment:**

$$\mu_{ij} = \langle i | -r | j \rangle \quad (1)$$

**Oscillator Strength:**

$$f_{ij} = \frac{2}{3}(E_i - E_j) |\langle i | -r | j \rangle|^2 \quad (2)$$

## 2. Chemical synthesis and characterization

### 2.1 Synthesis route of VBDfluors analogues 2a-5a.

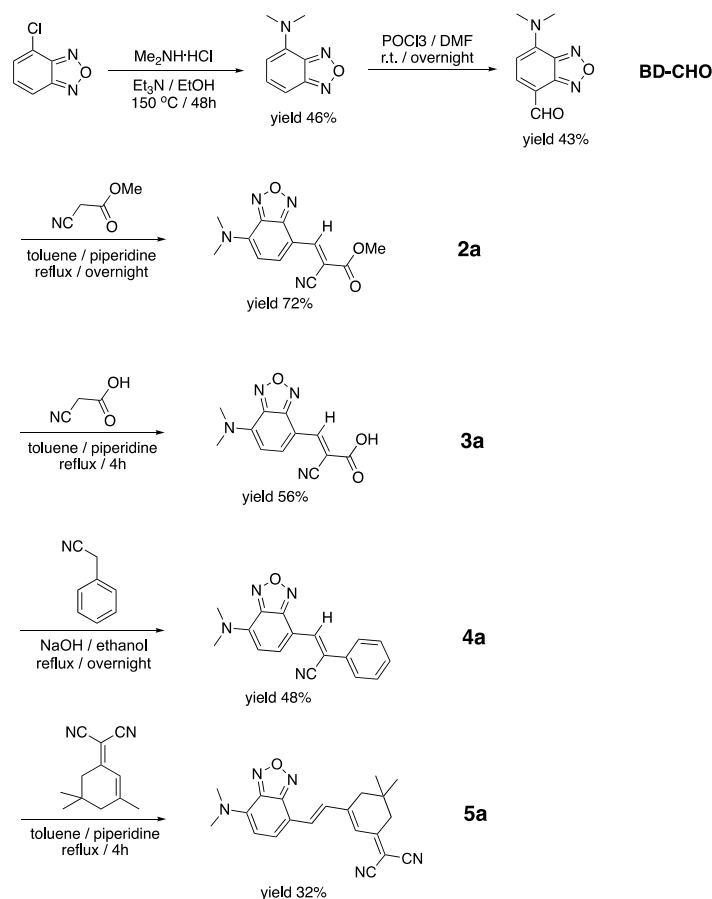

Scheme S1. Synthesis route of VBDfluors analogues 2a-5a.

### a. Synthesis of N, N-dimethyl-2,1,3-benzoxadiazole

Triethylamine (60 mmol, 6.07 g) was added to the mixture of 4-chlorobenzofuran (10 mmol, 1.54 g) and dimethylamine hydrochloride (50 mmol, 4.07 g) in ethanol (20 mL) in an autoclave and stirred at  $150^\circ\text{C}$  for 24 hours. After cooling to room temperature, ethanol was evaporated. 2M HCl (aq) was added to shift the *pH* value of the reaction mixture to neutral. After extraction by ethyl acetate (EA, 20 mL  $\times$  2), the upper layer was collected and dried with  $\text{Na}_2\text{SO}_4$ . After removing EA under reduced pressure, column chromatography (hexane/EA = 20/1, v/v) was applied for purification and afforded pure compound BD as a yellow solid (756 mg, yield 46%).  $^1\text{H-NMR}$  ( $\text{CDCl}_3$ , 300 MHz) (ppm): 7.25 (m, 1H), 7.06 (d,  $J = 8.8$  Hz, 1H), 6.08 (d,  $J = 7.4$  Hz, 1H), 3.33 (s, 6H).  $^{13}\text{C NMR}$  ( $\text{CDCl}_3$ , 75 MHz) (ppm): 151.02, 145.85, 139.95, 133.55, 105.09, 102.28, 42.16.

### b. Synthesis of compound BD-CHO

Phosphorous oxychloride (15 mmol, 2.30 g) was added dropwise to anhydrous DMF

(75 mmol, 5.47g) in ice bath condition with nitrogen protection, followed by stirring for 10 min. Compound BD (3 mmol, 489 mg) in 3 mL anhydrous DMF was added dropwise to the reaction solution in ice bath, then reacted at room temperature for 2 h. After compound BD was totally reacted, ice water was added and then stirred for overnight. Red solid was precipitated. Then 30 mL 10% NaOH (aq) was added and stirred for another 2 h. Followed by collecting red precipitate, the target product BD-CHO was obtained by purification of column chromatography (PE/EA=5/1, v/v) as yellow solid (246 mg, yield 43%). <sup>1</sup>H-NMR (CDCl<sub>3</sub>, 400 MHz) (ppm): 10.05 (s, 1H), 7.91 (d, *J* = 8.2 Hz, 1H), 6.17 (d, *J* = 8.2 Hz, 1H), 3.60 (s, 6H). <sup>13</sup>C NMR (CDCl<sub>3</sub>, 75 MHz) (ppm): 186.11, 147.70, 145.15, 144.99, 142.70, 111.35, 102.45, 43.07. ESI-MS: [M+H]<sup>+</sup> calculated for C<sub>9</sub>H<sub>9</sub>N<sub>3</sub>O<sub>2</sub>: 192.07; Found 192.20.

#### c. Synthesis of dye 2a

BD-CHO (0.5 mmol, 90 mg) and methyl cyanoacetate (2 mmol, 198 mg) were dissolved in 10 mL toluene, followed by adding piperidine (0.1 mmol, 10 μL) and reflux for overnight. After cooling to room temperature and removing the solvent, the target product was purified by column chromatography (PE/DCM = 6/1). The target product was obtained as solid (98 mg, yield 72%). <sup>1</sup>H-NMR (CD<sub>3</sub>CN, 400 MHz) (ppm): 8.61 (d, *J*=8.9 Hz, 1H), 8.57 (s, 1H), 6.42 (d, *J*=8.8 Hz, 1H), 3.88 (s, 3H), 3.57 (s, 6H). ESI-MS: [M+K]<sup>+</sup> calculated for C<sub>13</sub>H<sub>12</sub>N<sub>4</sub>O<sub>3</sub>: 311.09; Found 311.1.

#### d. Synthesis of dye 3a

BD-CHO (0.5 mmol, 90mg) and cyanoacetic acid (2 mmol, 170mg) were dissolved in 10 mL toluene, followed by adding piperidine (0.1 mmol, 10 μL) and reflux for 4h. After cooling to room temperature, the solvent was removed, followed by purification of column chromatography (PE/EA = 7/1). The target product was obtained as brown solid (72mg, yield 56%). <sup>1</sup>H-NMR (CD<sub>3</sub>CN, 300 MHz) (ppm): 7.50 (m, 2H), 6.35 (d, *J*=16.3 Hz, 1H), 6.16 (d, *J*=8.2 Hz, 1H), 3.43 (s, 6H). <sup>13</sup>C NMR (CD<sub>3</sub>CN, 75 MHz) (ppm): 150.00, 147.24, 147.04, 140.97, 136.07, 120.96, 114.33, 109.27, 104.91, 94.96, 43.29. ESI-MS: [M-H]<sup>+</sup> calculated for C<sub>12</sub>H<sub>10</sub>N<sub>4</sub>O<sub>3</sub>: 257.08; Found 257.2.

#### e. Synthesis of dye 4a

BD-CHO (0.5 mmol, 90 mg), 2-phenylacetonitrile (2 mmol, 234 mg) and Sodium

hydroxide (0.2 mmol, 8 mg) were dissolved in 10 mL EtOH, followed reflux for overnight. After cooling to room temperature, solvent was removed. The target product was purified by column chromatography (PE/DCM = 4/1). Yield was calculated to be 48%. <sup>1</sup>H-NMR (CD<sub>3</sub>CN, 400 MHz) (ppm): 8.44 (d, *J*=8.0 Hz, 1H), 8.10 (s, 1H), 7.75 (d, *J*=7.6 Hz, 2H), 7.51 (m, 3H), 6.39 (d, *J*=8.5 Hz, 1H), 3.49 (s, 6H). ESI-MS: [M+H]<sup>+</sup> calculated for C<sub>17</sub>H<sub>14</sub>N<sub>4</sub>O: 291.12; Found 291.3.

**f. Synthesis of dye 5a**

BD-CHO (0.5 mmol, 90 mg) and 2-(3,5,5-trimethylcyclohex-2-en-1-ylidene) malononitrile (1 mmol, 186 mg) were dissolved in 10 mL toluene, followed by adding piperidine (0.1 mmol, 10 μL) and reflux for 4 h. After cooling to room temperature and removing the solvent, the target product was purified by column chromatography (PE/DCM = 1/1). The target product was obtained as solid (56 mg, yield 32%). <sup>1</sup>H-NMR (CDCl<sub>3</sub>, 400 MHz) (ppm): 7.56 (d, *J*=15.8 Hz, 1H), 7.35 (d, *J*=7.7 Hz, 1H), 7.16 (d, *J*=15.9 Hz, 1H), 6.90 (s, 1H), 6.11 (d, *J*=7.8 Hz, 1H), 3.49 (s, 6H), 2.55 (d, *J*=37.8 Hz, 4H), 1.10 (s, 6H). <sup>13</sup>C NMR (CD<sub>3</sub>CN, 125 MHz) (ppm): 169.16, 155.00, 148.88, 145.70, 140.84, 136.64, 133.07, 129.61, 122.86, 114.20, 113.27, 111.88, 104.61, 43.18, 42.63, 39.39, 32.17, 28.24. ESI-MS: [M] calculated for C<sub>21</sub>H<sub>21</sub>N<sub>5</sub>O: 359.17; Found 359.5.

**Table S1.** Transition Dipole Moment and Oscillator Strength of 2a-5a

| VBDfluors | Trans. Dip. x <sup>1</sup> | Trans. Dip. y <sup>1</sup> | Trans. Dip. z <sup>1</sup> | Dip. S. <sup>2</sup> | Oscil.str. <sup>3</sup> |
|-----------|----------------------------|----------------------------|----------------------------|----------------------|-------------------------|
| 2a        | 2.762369                   | 0.026609                   | 0.000050                   | 7.631390             | 0.486070                |
| 3a        | 2.821430                   | -0.227163                  | 0.022736                   | 8.012586             | 0.514770                |
| 3a'       | 2.207190                   | -0.279304                  | 0.000502                   | 4.949700             | 0.303250                |
| 4a        | 2.711938                   | -0.131641                  | -0.051501                  | 7.374591             | 0.433960                |
| 5a        | -4.502951                  | 0.201146                   | -0.036904                  | 20.318393            | 1.088170                |

1. Trans. Dip. x/y/z: transition dipole moment at x/y/z directions; 2. Dip. S.: square of transition dipole moment  $|\langle i | -r | j \rangle|^2$ ; 3. Oscil.str.: Oscillator Strength.

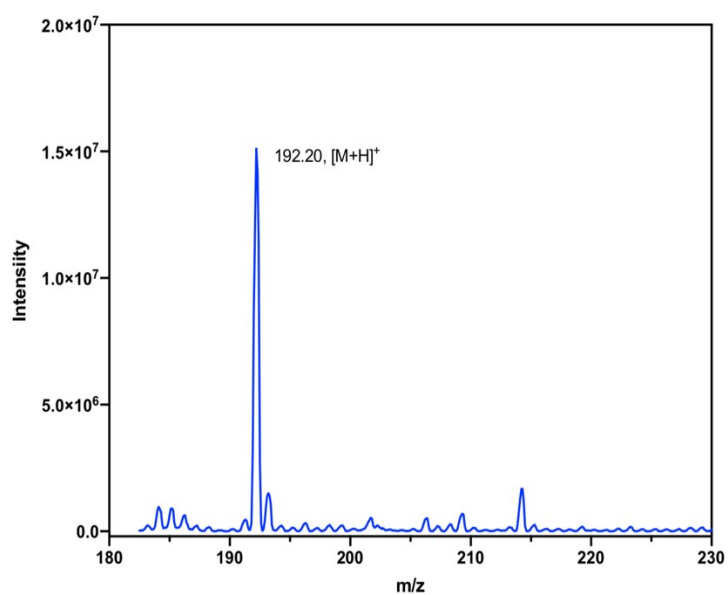**Figure S1.** ESI mass spectrum of dye BD-CHO.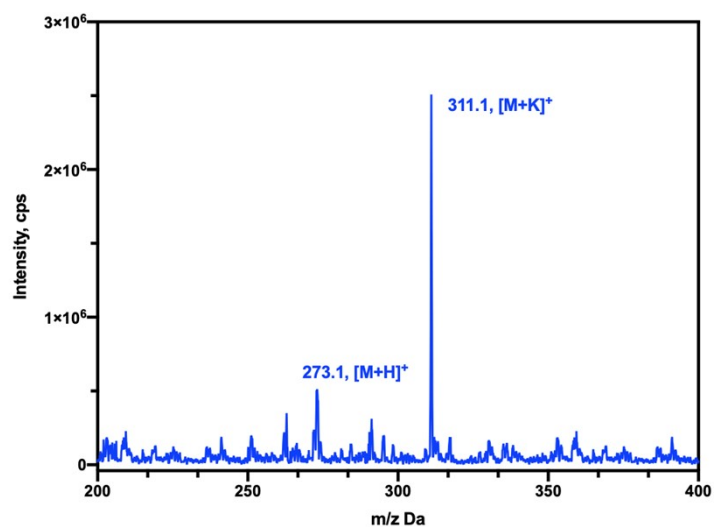**Figure S2.** ESI mass spectrum of dye 2a.

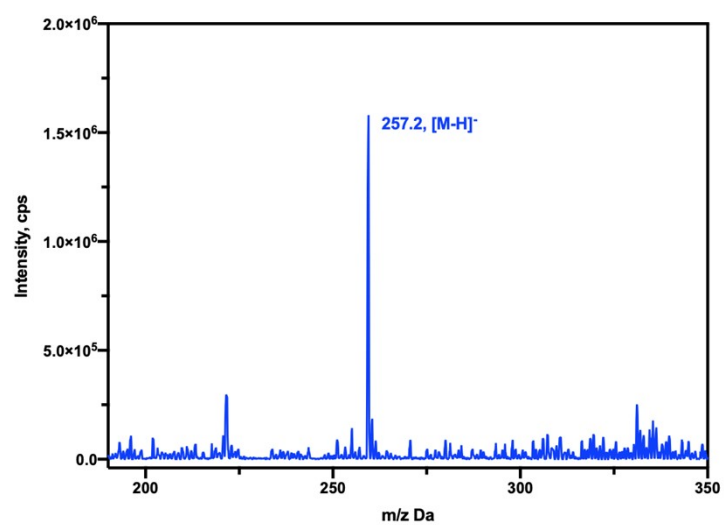

**Figure S3.** ESI mass spectrum of dye 3a.

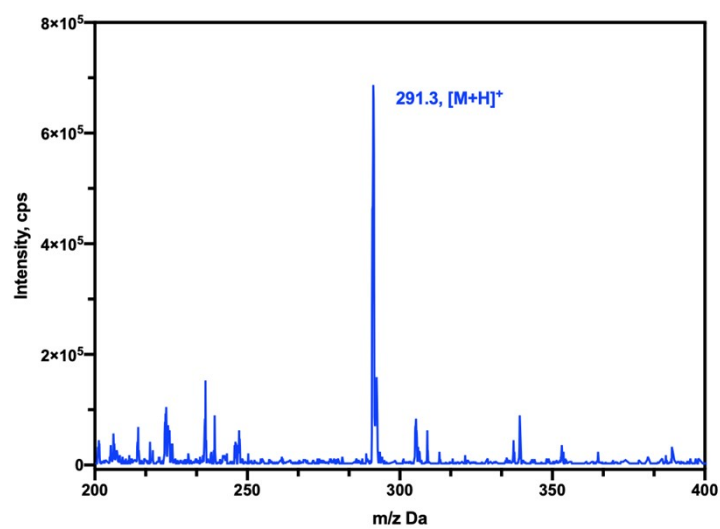

**Figure S4.** ESI mass spectrum of dye 4a.

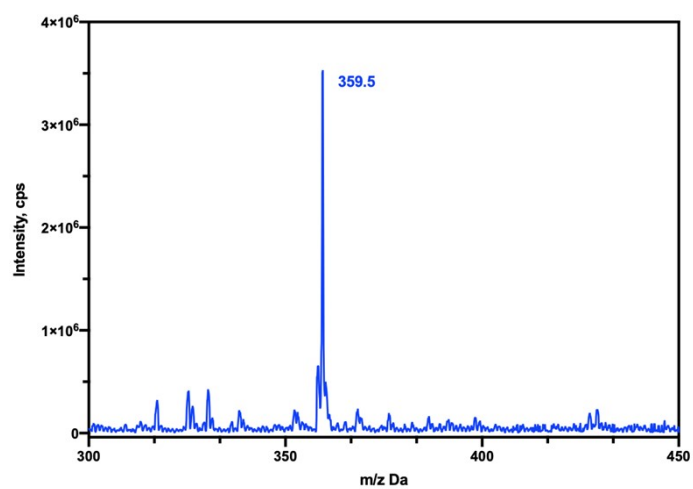

**Figure S5.** ESI mass spectrum of dye 5a.

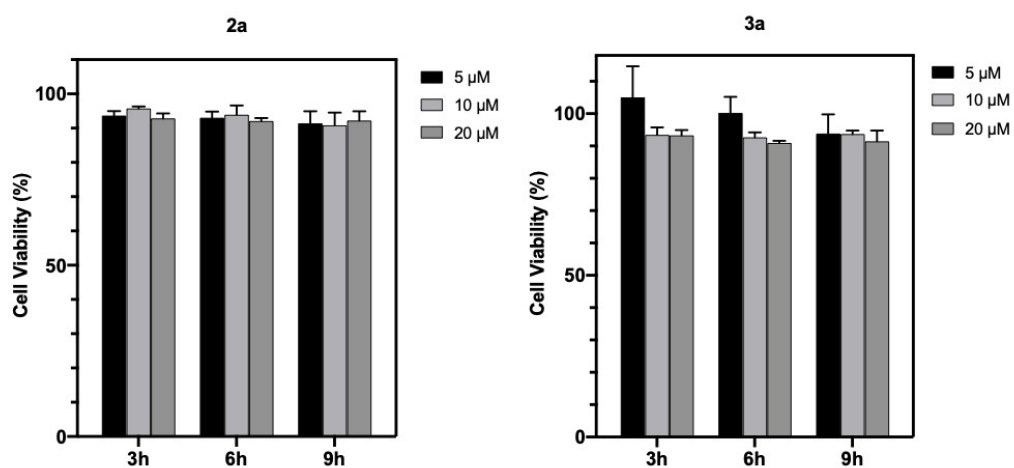

**Figure S6.** Cytotoxicity of 2a and 3a in HeLa cells (incubation for 3/6/9 h).

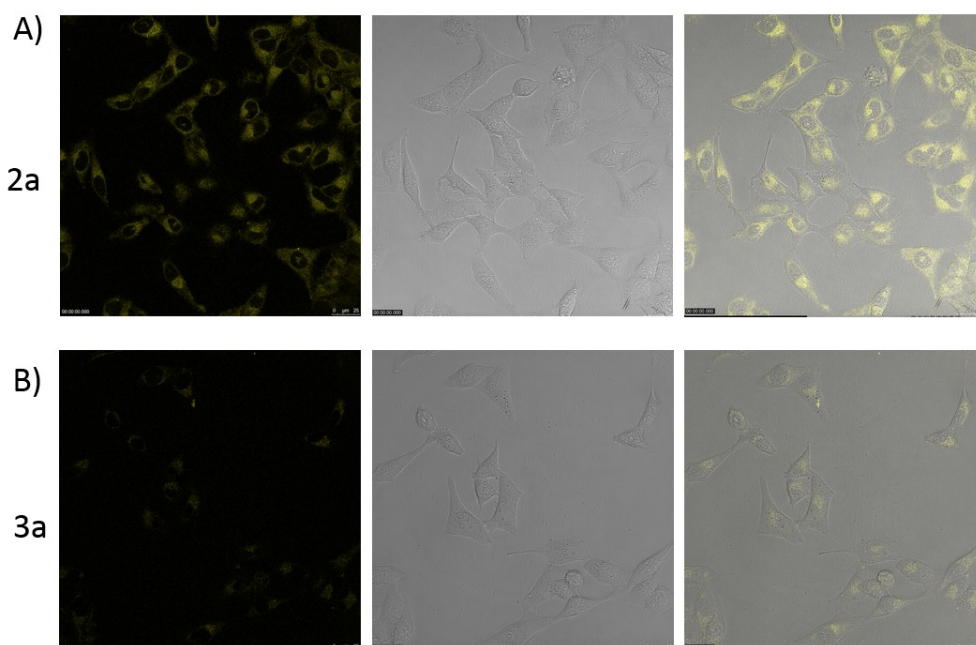

**Figure S7.** cellular uptake of 2a and 3a. Scale bar: 10 μm. Probe: 10 μM. Incubation time: 30 min.



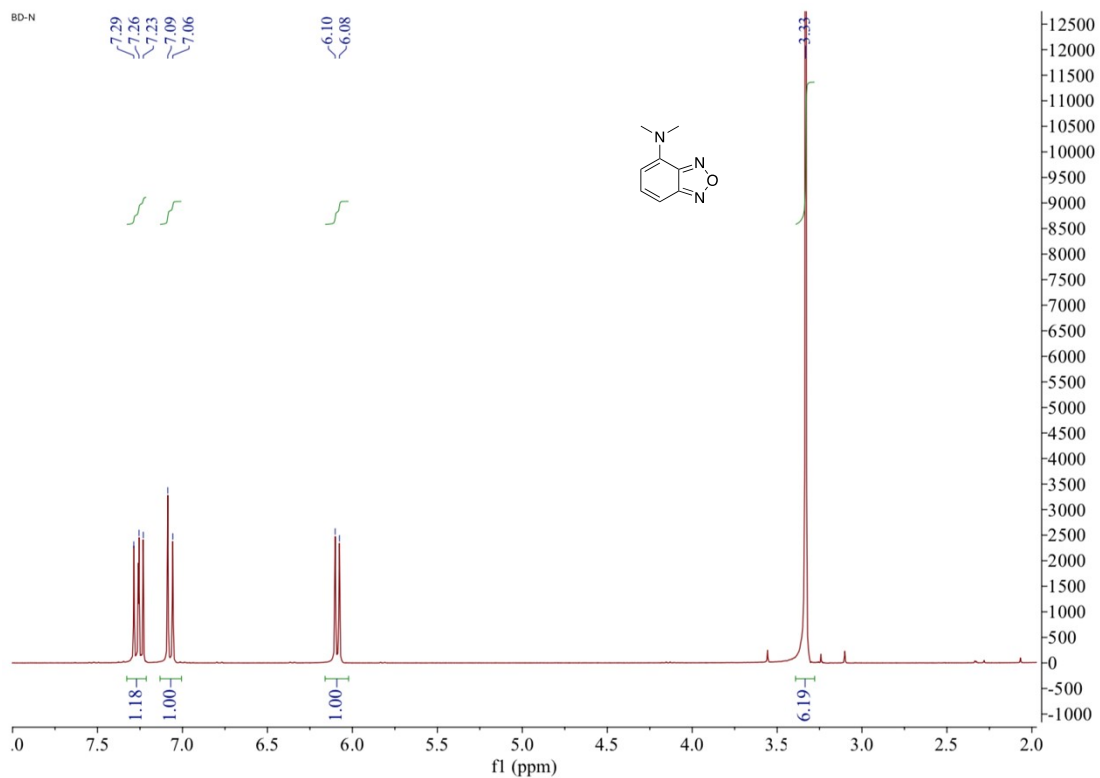

$^1\text{H}$  NMR spectrum of compound N, N-dimethyl-2,1,3-benzoxadiazole in  $\text{CDCl}_3$ .

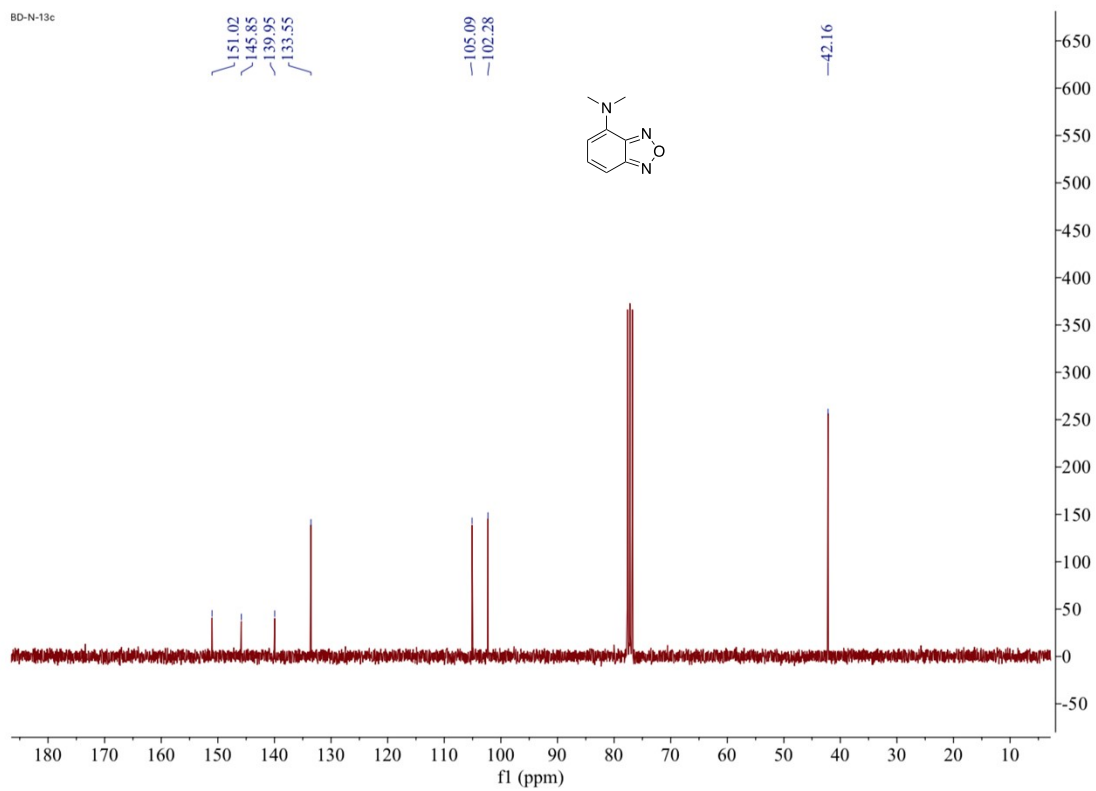

$^{13}\text{C}$  NMR spectrum of compound N, N-dimethyl-2,1,3-benzoxadiazole in  $\text{CDCl}_3$ .

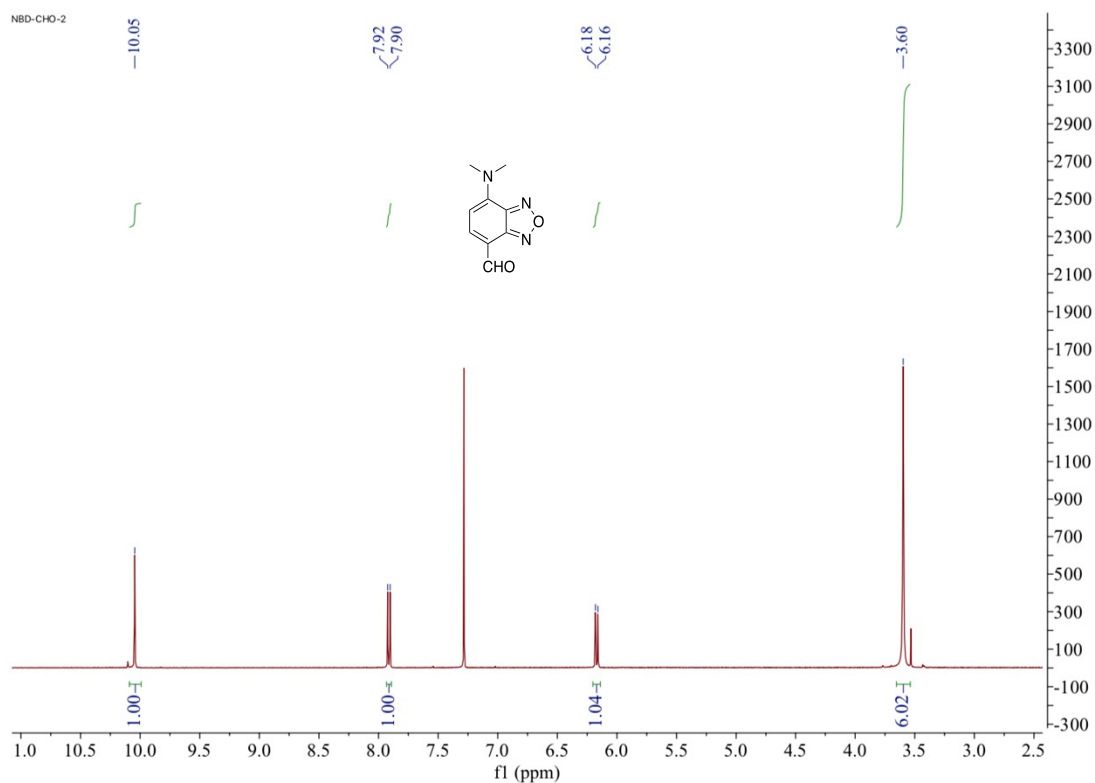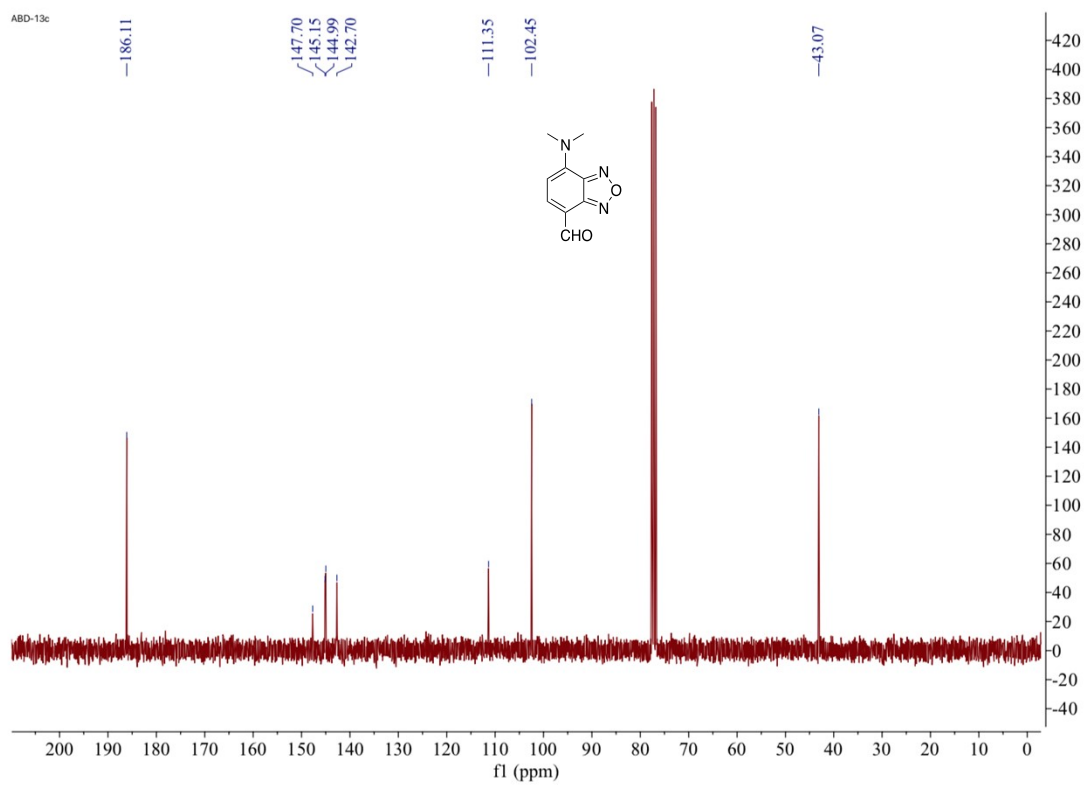

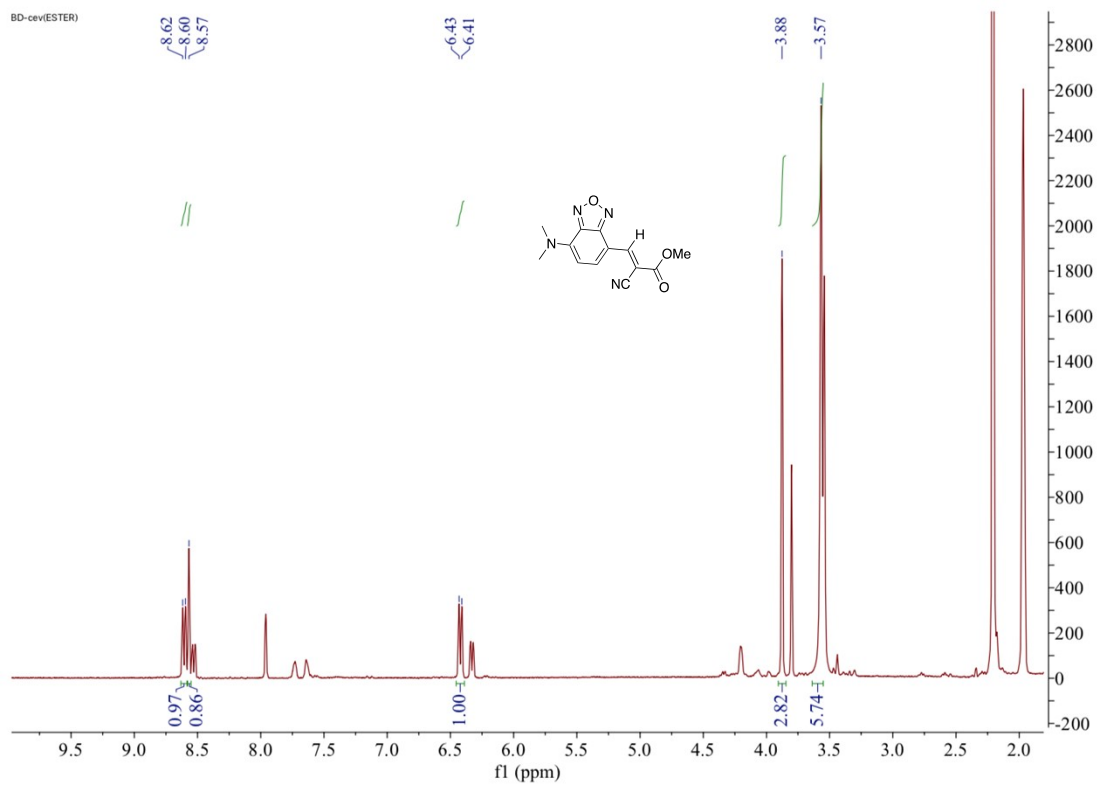

$^1\text{H}$  NMR spectrum of dye 2a in  $\text{CD}_3\text{CN}$ .

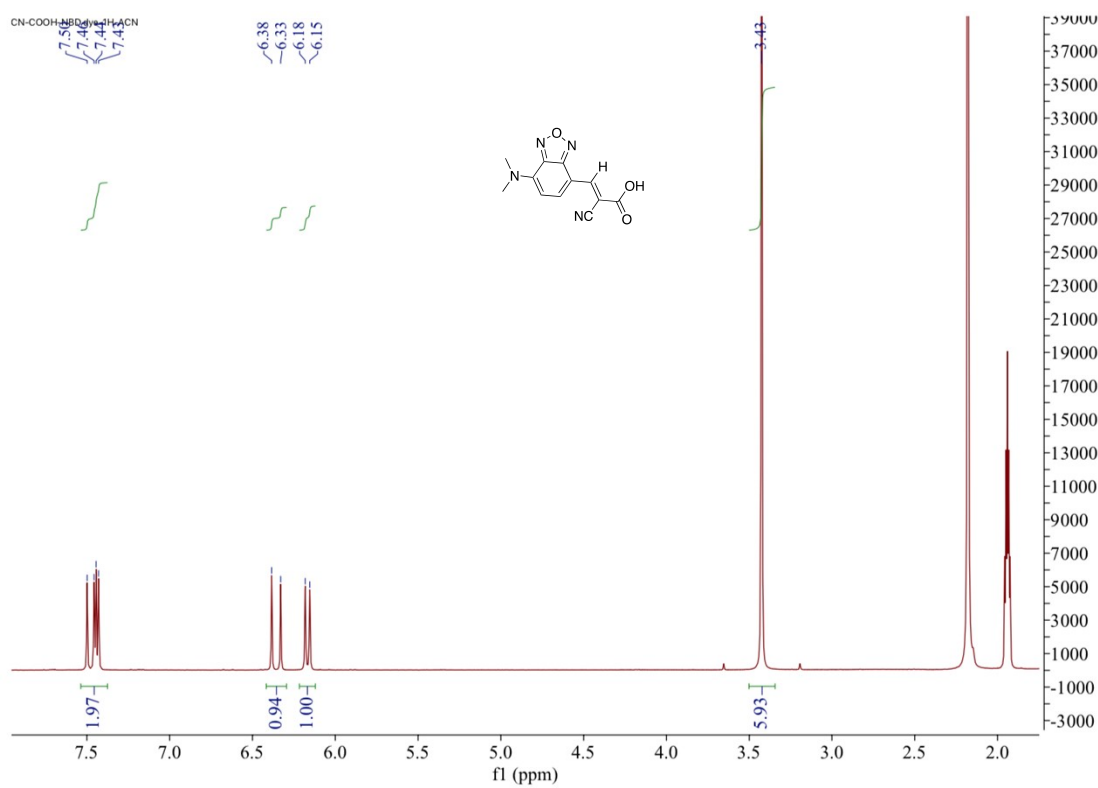

$^1\text{H}$  NMR spectrum of dye 3a in  $\text{CD}_3\text{CN}$ .

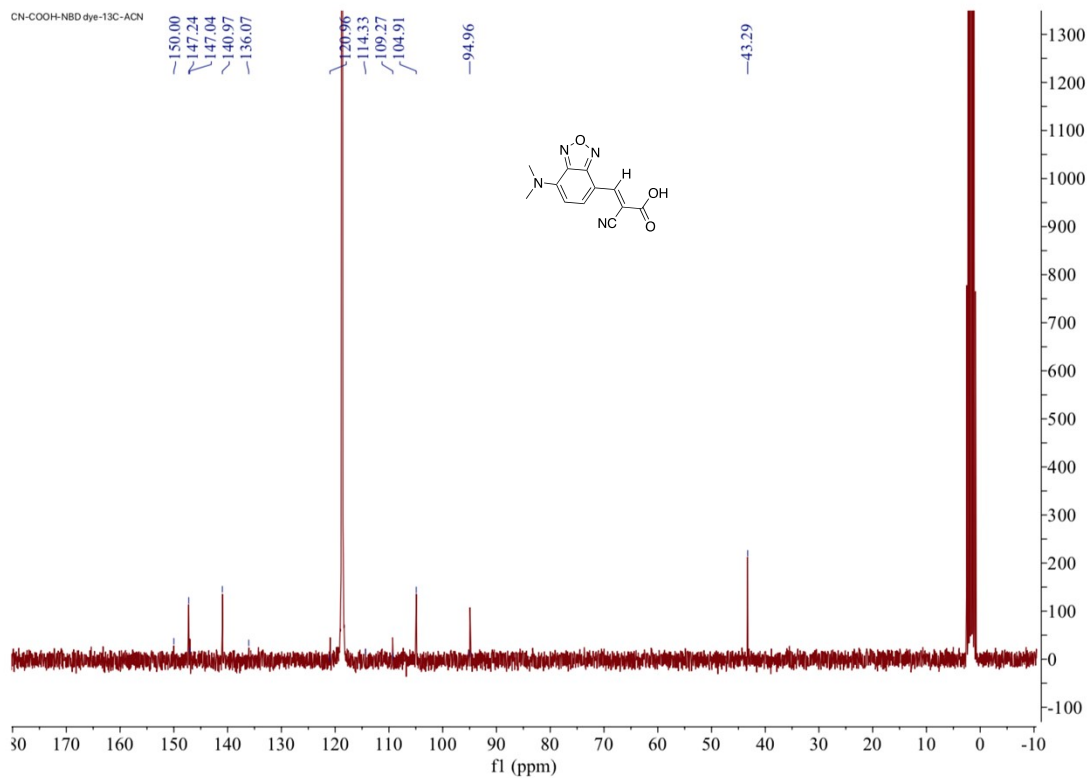

$^{13}\text{C}$  NMR spectrum of dye 3a in  $\text{CD}_3\text{CN}$ .

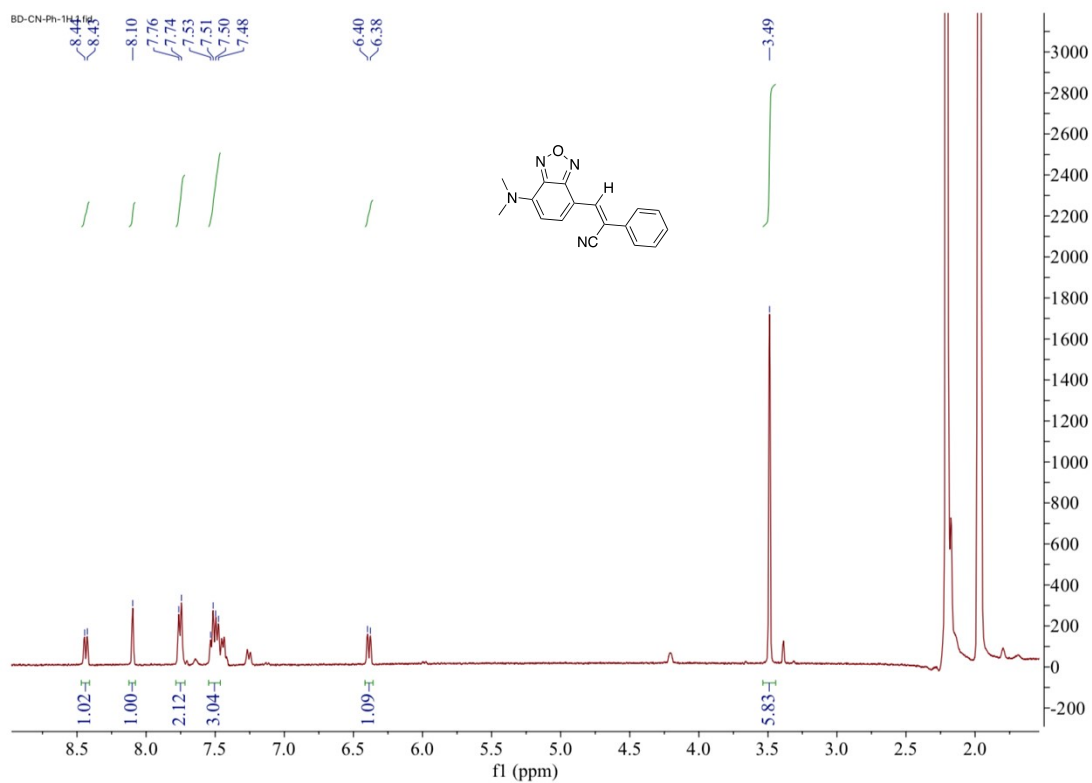

$^1\text{H}$  NMR spectrum of dye 4a in  $\text{CD}_3\text{CN}$ .

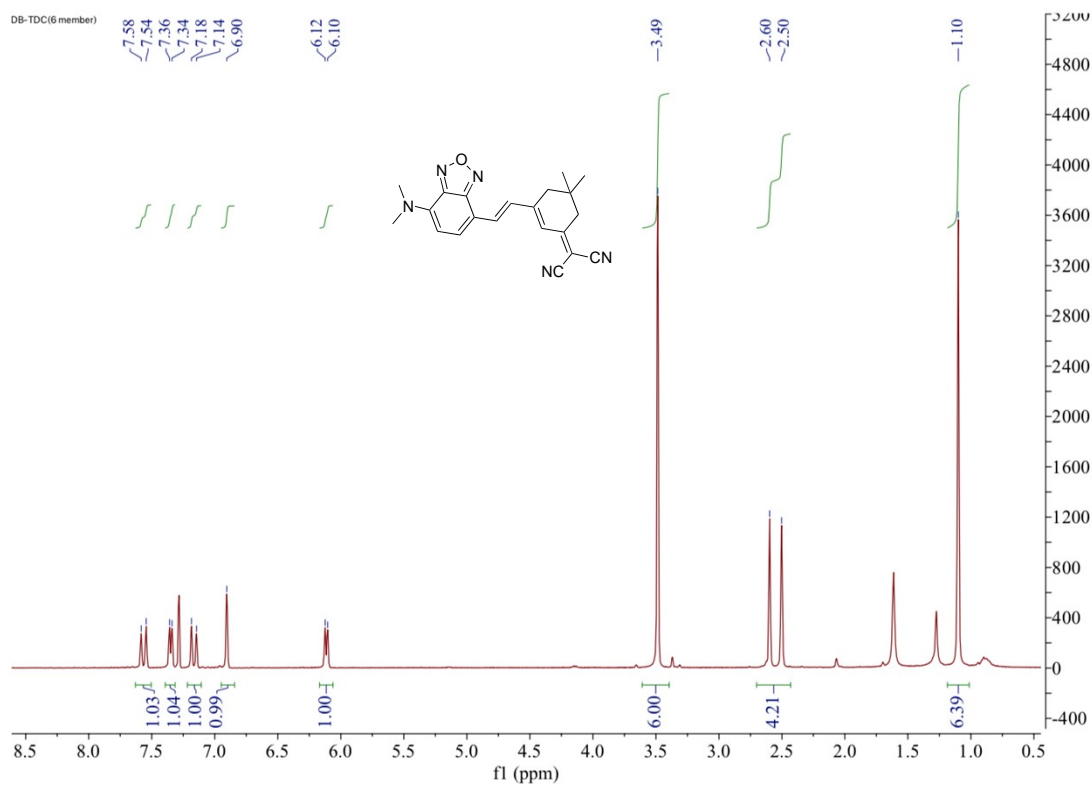

<sup>1</sup>H NMR spectrum of dye 5a in CDCl<sub>3</sub>.

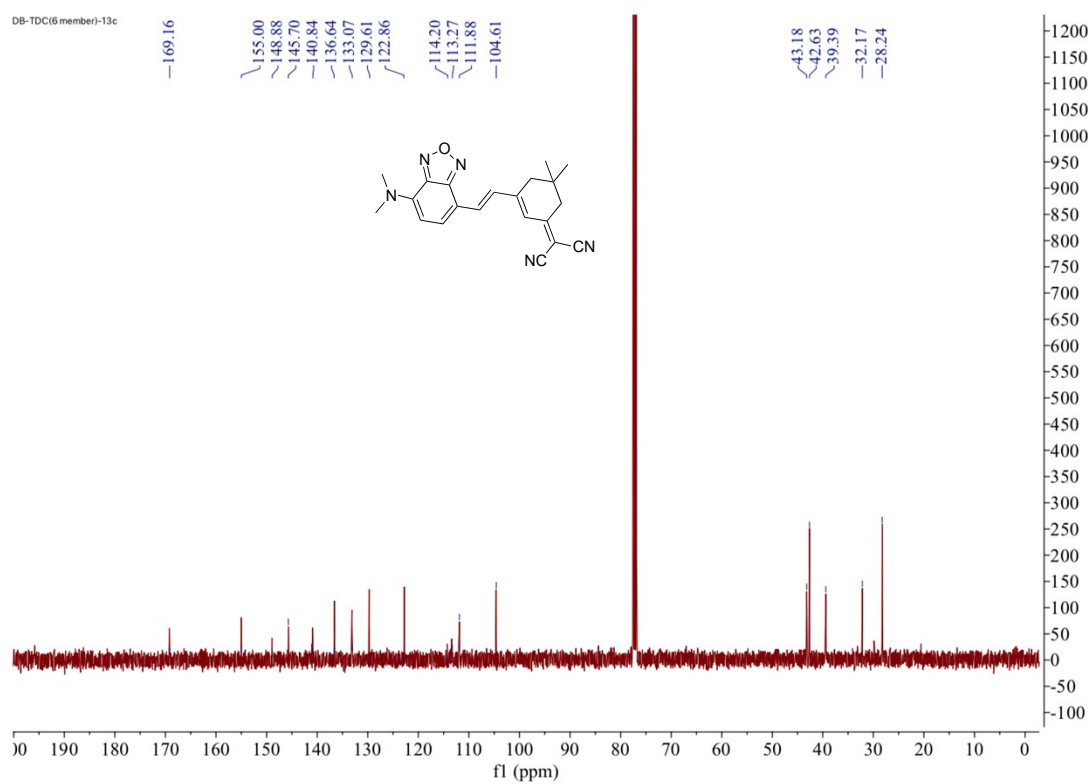

<sup>13</sup>C NMR spectrum of dye 5a in CDCl<sub>3</sub>.

## References

1. Frisch, M. J.; Trucks, G. W.; Schlegel, H. B.; Scuseria, G. E.; Robb, M. A.; Cheeseman, J. R.; Scalmani, G.; Barone, V.; Petersson, G. A.; Nakatsuji, H.; Li, X.; Caricato, M.; Marenich, A. V.; Bloino, J.; Janesko, B. G.; Gomperts, R.; Mennucci, B.; Hratchian, H. P.; Ortiz, J. V.; Izmaylov, A. F.; Sonnenberg, J. L.; Williams; Ding, F.; Lipparini, F.; Egidi, F.; Goings, J.; Peng, B.; Petrone, A.; Henderson, T.; Ranasinghe, D.; Zakrzewski, V. G.; Gao, J.; Rega, N.; Zheng, G.; Liang, W.; Hada, M.; Ehara, M.; Toyota, K.; Fukuda, R.; Hasegawa, J.; Ishida, M.; Nakajima, T.; Honda, Y.; Kitao, O.; Nakai, H.; Vreven, T.; Throssell, K.; Montgomery Jr., J. A.; Peralta, J. E.; Ogliaro, F.; Bearpark, M. J.; Heyd, J. J.; Brothers, E. N.; Kudin, K. N.; Staroverov, V. N.; Keith, T. A.; Kobayashi, R.; Normand, J.; Raghavachari, K.; Rendell, A. P.; Burant, J. C.; Iyengar, S. S.; Tomasi, J.; Cossi, M.; Millam, J. M.; Klene, M.; Adamo, C.; Cammi, R.; Ochterski, J. W.; Martin, R. L.; Morokuma, K.; Farkas, O.; Foresman, J. B.; Fox, D. J. *Gaussian 16 Rev. C.01*, Wallingford, CT, 2016.
2. Kohn, W.; Sham, L. J., Self-consistent equations including exchange and correlation effects. *Physical review* **1965**, *140* (4A), A1133.
3. Gross, E.; Kohn, W., Local density-functional theory of frequency-dependent linear response. *Physical review letters* **1985**, *55* (26), 2850.
4. Lu, T.; Chen, F., Multiwfn: a multifunctional wavefunction analyzer. *Journal of computational chemistry* **2012**, *33* (5), 580-592.
5. Humphrey, W.; Dalke, A.; Schulten, K., VMD: visual molecular dynamics. *Journal of molecular graphics* **1996**, *14* (1), 33-38.
